# Supplementary material for: Benzothiadiazole-oligothiophene flanked dicyanomethylenated quinacridone for non-fullerene acceptors in polymer solar cells
Source: Royal Society of Chemistry journal article supplement (doi:10.1039/c8nj00102b), 2018-01-01
Supplement: c8nj00102b1.pdf [file c8nj00102b1.pdf]

## Electronic Supplementary Information

### Benzothiadiazole-oligothiophene flanked dicyanomethylenated quinacridone for non-fullerene acceptors in polymer solar cells

Junjun Su,<sup>a</sup> Xin Wen,<sup>a</sup> Weiping Chen,<sup>\*a</sup> Yang Miao,<sup>b</sup> Fenghong Li<sup>\*b</sup> and Yue Wang<sup>\*b</sup>

<sup>a</sup> College of Chemistry and Environmental Science, Hebei University, Baoding, 071002, China. E-mail: chenweipingjlu@163.com (W. Chen).

<sup>b</sup> State Key Laboratory of Supramolecular Structure and Materials, Jilin University, Changchun, 130012, China. E-mails: fhli@jlu.edu.cn (F. Li); yuewang@jlu.edu.cn (Y. Wang).

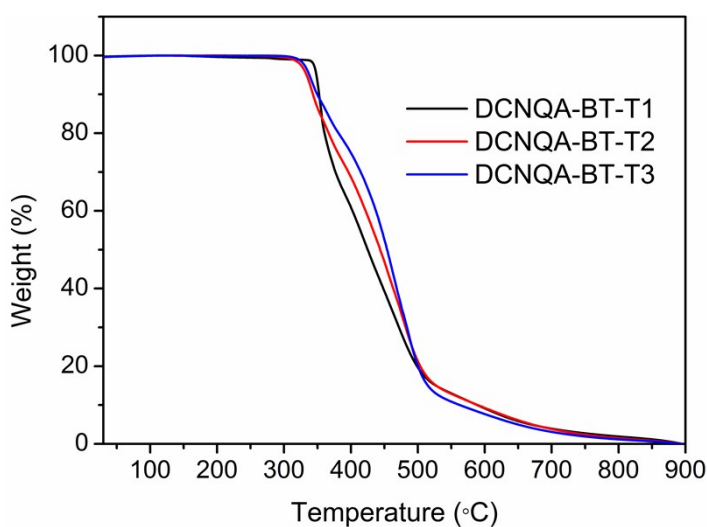

**Fig. S1** TGA curves of DCNQA-BT- $T_n$  ( $n=1-3$ ).

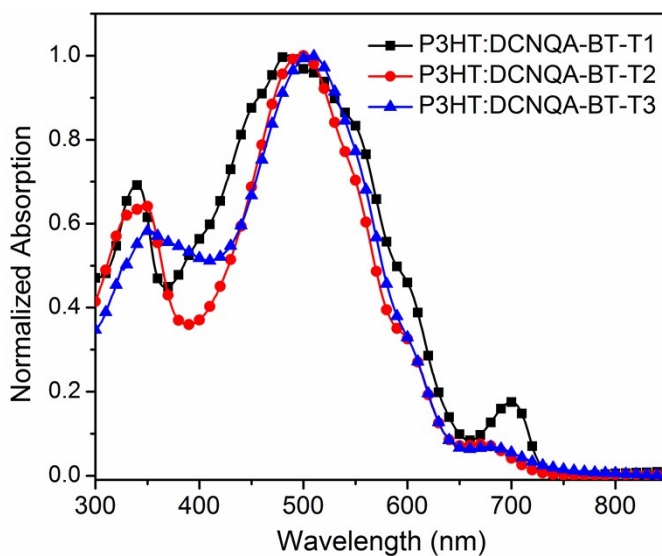

**Fig. S2** Normalized UV-visible absorption spectra of P3HT:DCNQA-BT- $T_n$  ( $n=1-3$ ) blend films.

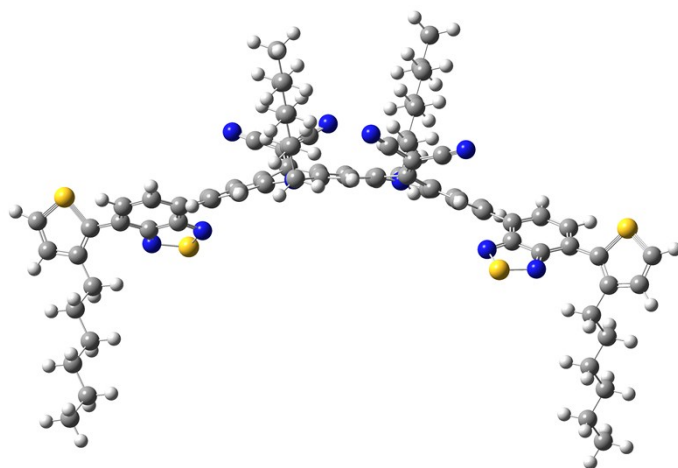

**Fig. S3** DFT optimized geometry of DCNQA-BT-T1.

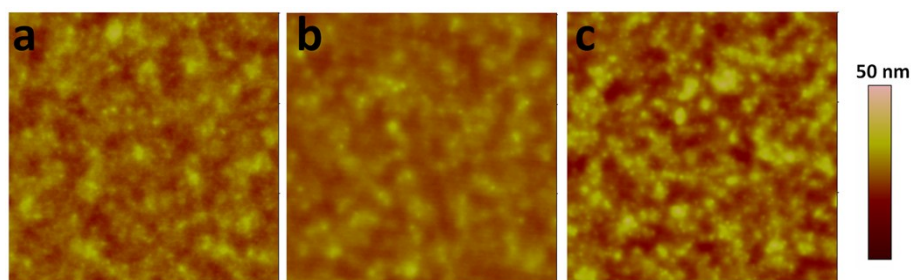

**Fig. S4** Atomic force microscopy images ( $3 \times 3 \mu\text{m}$ ) of blend films: (a) P3HT:PC<sub>61</sub>BM; (b) P3HT:DCNQA-BT-T2; (c) P3HT:DCNQA-BT-T3.

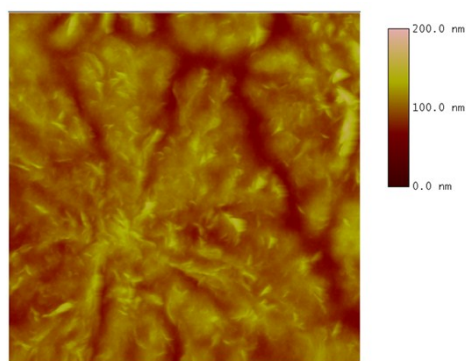

**Fig. S5** Atomic force microscopy images ( $3 \times 3 \mu\text{m}$ ) of annealed blend films of P3HT:PC<sub>61</sub>BM.

**Table S1.** PCE distribution of 5 individual P3HT:DCNQA-BT-Tn and P3HT:PC<sub>61</sub>BM devices.

| device                   | PCE (%) |      |      |      |      | Average |
|--------------------------|---------|------|------|------|------|---------|
|                          | 1       | 2    | 3    | 4    | 5    |         |
| P3HT:DCNQA-BT-T1         | 0.66    | 0.70 | 0.72 | 0.76 | 0.79 | 0.73    |
| P3HT:DCNQA-BT-T2         | 0.20    | 0.21 | 0.21 | 0.22 | 0.31 | 0.23    |
| P3HT:DCNQA-BT-T3         | 0.16    | 0.18 | 0.18 | 0.20 | 0.28 | 0.20    |
| P3HT:PC <sub>61</sub> BM | 2.65    | 2.65 | 2.76 | 2.80 | 2.88 | 2.75    |
